# Supplementary material
Source: PubMed Central journal article supplement (PMC6030474)
Supplement: NIHMS959877-supplement-2.pdf [file NIHMS959877-supplement-2.pdf]

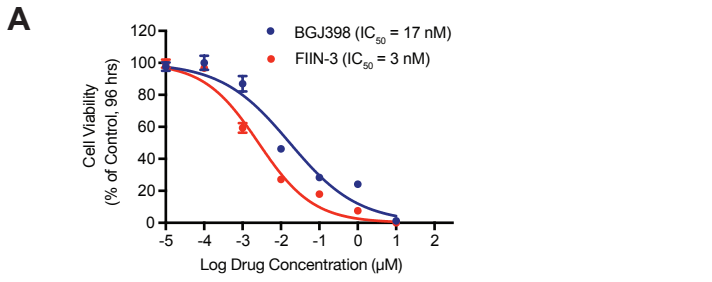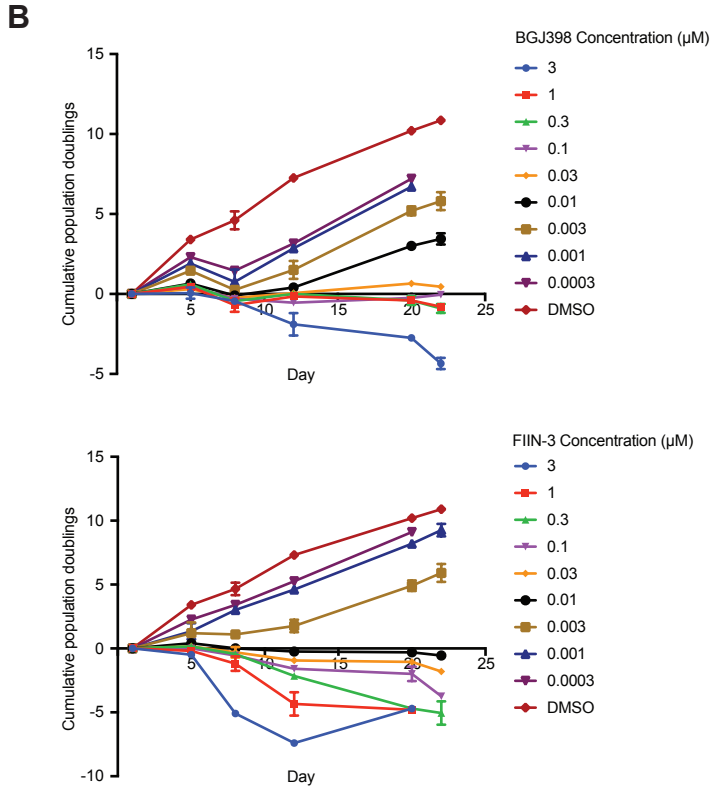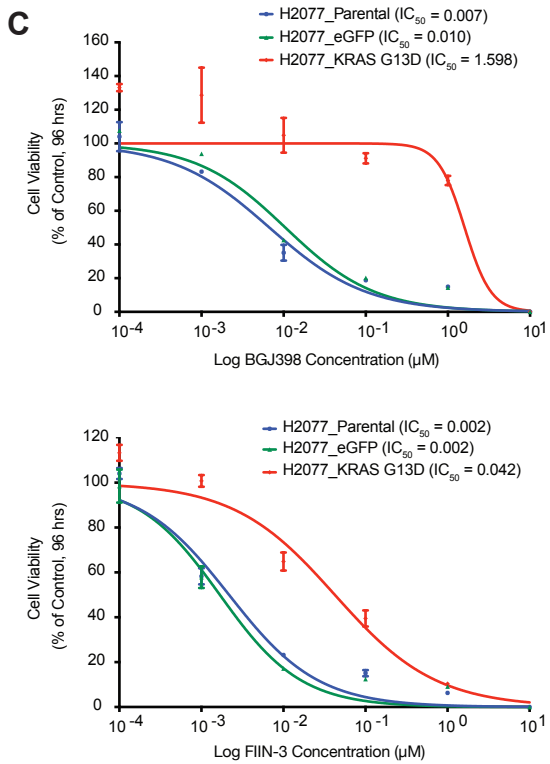

**Figure S1**

**Figure S1, related to Figure 1. Sensitivity of NCI-H2077 to FGFR inhibition**

A) Cell viability at 96 hours of NCI-H2077 cells treated with the FGFR inhibitors, BGJ398 and FIIN-3.

B) Cumulative population doublings of NCI-H2077 cells transduced with eGFP in conditions similar to those employed in the open reading frame (ORF) screen. Cells were treated with a range of concentrations of BGJ398 or FIIN-3 as indicated for 3 weeks. Based on the growth curves two doses were chosen to be employed in the final ORF screen (100 nM and 300 nM), as these doses suppressed population doubling but did not induce extensive cell killing.

C) Cell viability assay for BGJ398 (top panel) and FIIN-3 (bottom panel) in NCI-H2077 cells (parental), NCI-H2077 cells expressing eGFP, and NCI-H2077 cells expressing *KRAS* G13D.
