# Supplementary material
Source: PubMed Central journal article supplement (PMC6030474)
Supplement: NIHMS959877-supplement-3.pdf [file NIHMS959877-supplement-3.pdf]

**A**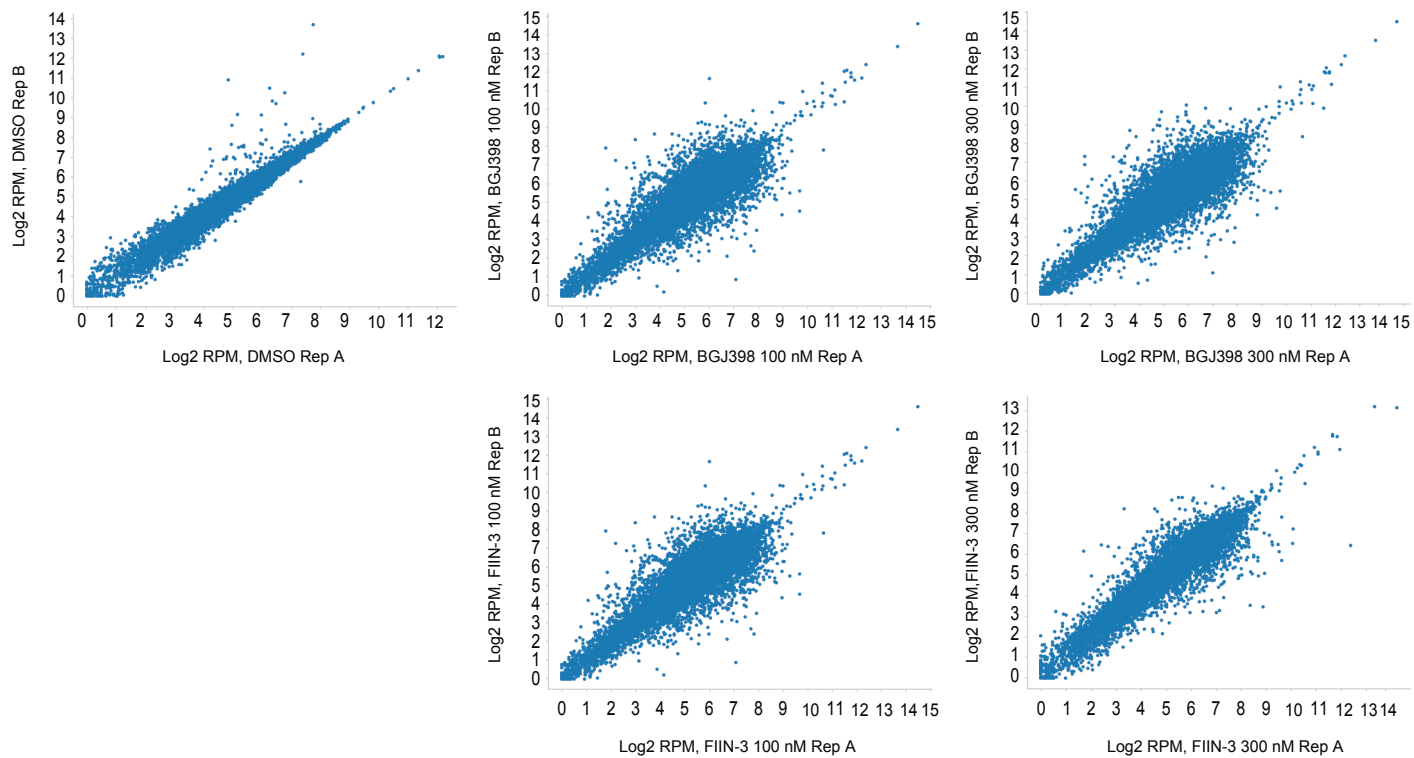**B**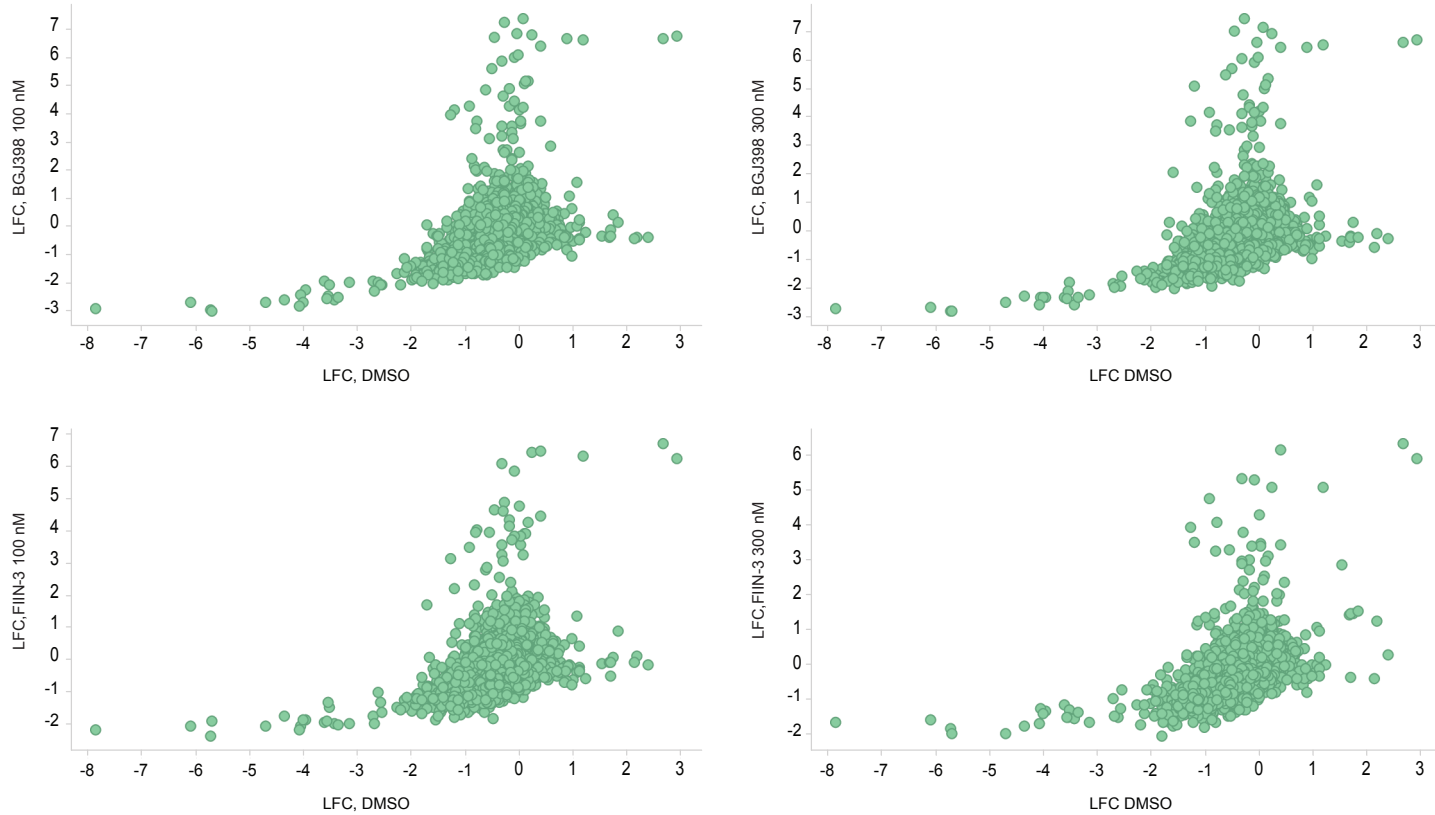**Figure S2**

**Figure S2, related to Figure 1. ORF screen for resistance to FGFR inhibition.**

A)  $\log_2$  of reads per million (RPM) of each ORF showing high replicate reproducibility between replicates (Rep) A and B for DMSO, BGJ398 100 and 300 nM, and FIIN-3 100 and 300 nM.

B) Scatter plot of  $\log_2$  fold-change (LFC) of each ORF in drug treatment as compared to DMSO.

**A**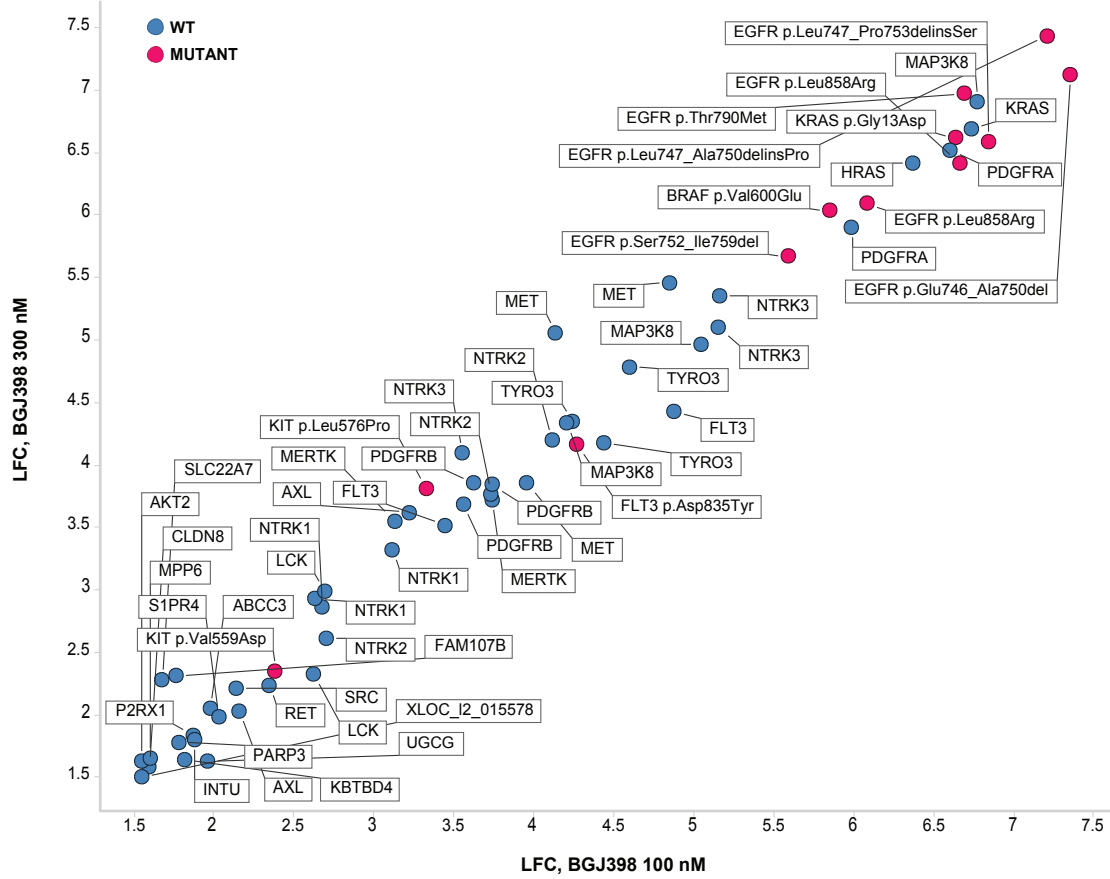**B**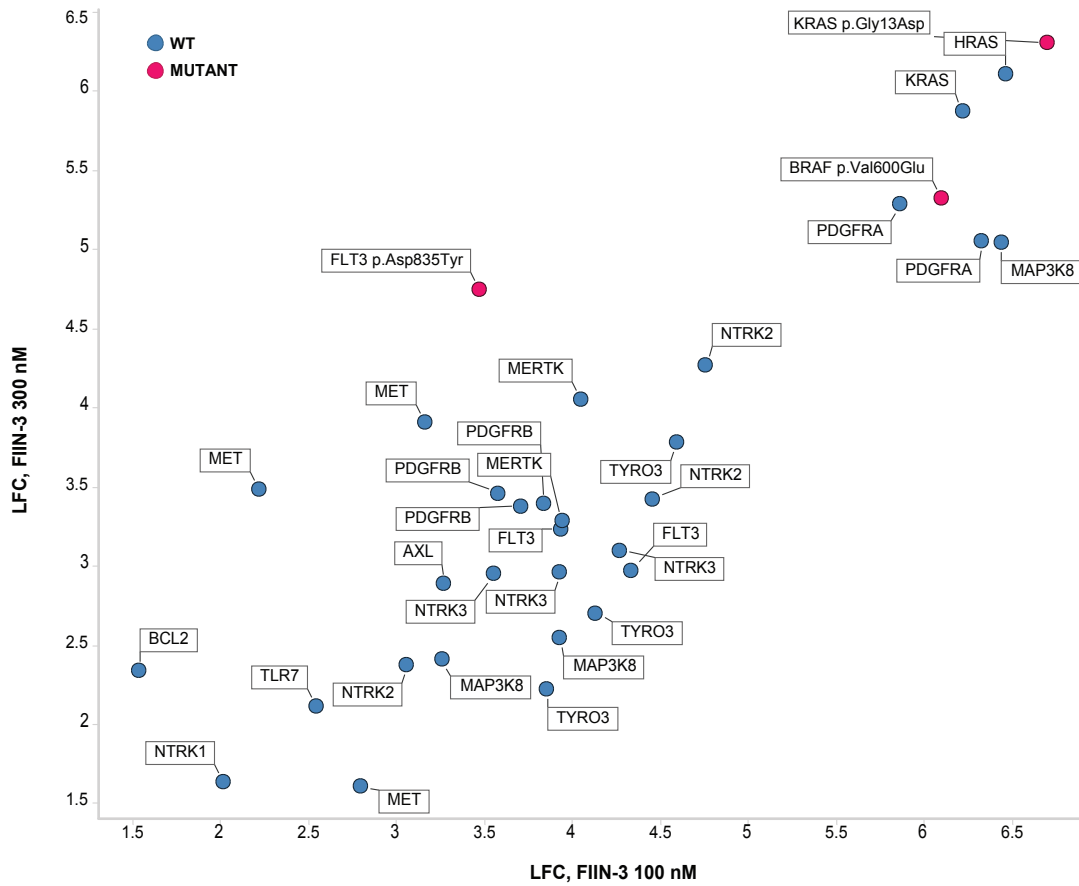**Figure S3**

**Figure S3, related to Figure 1. Candidate mediators of resistance to FGFR inhibition based on genome-wide pooled ORF screen**

A) Scatter plot displaying ORFs with LFC greater than or equal to 1.5, following treatment with BGJ398 at 100 nM or 300 nM compared to the early-time point. LFC values represent the average of replicate A and B. Wild-type transcripts are labeled in blue and mutant forms in red (WT, wild-type).

B) As in A, except with for ORFs enriched following treatment with FIIN-3.
