# Supplementary material
Source: PubMed Central journal article supplement (PMC6030474)
Supplement: NIHMS959877-supplement-7.pdf [file NIHMS959877-supplement-7.pdf]

## Supplementary Table 1

|                  | IC50 (nM) |        |
|------------------|-----------|--------|
|                  | BGJ398    | FIIN-3 |
| FGFR1            | 10        | 1      |
| FGFR2            | 11        | <1     |
| FGFR3            | 14        | N/A*   |
| FGFR4            | 392       | 22     |
| EGFR L858R       | >8000     | 17     |
| EGFR exon 19 del | N/A*      | 240    |

\* Data not available

### Supplementary Table 1. Pharmacologic activity of BGJ398 and FIIN-3.

Antiproliferative activity (IC<sub>50</sub>) of BGJ398 and FIIN-3 against various genotypes of FGFR and EGFR transformed murine Ba/F3 cells. \*N/A, data not available. Data obtained from Guagnano et al. and Tan et al. (26, 34).

## Supplementary Table 2

| EGFR form                | LFC, FIIN-3 100 nM | LFC, FIIN-3 300 nM |
|--------------------------|--------------------|--------------------|
| p.Leu747_Ala750delinsPro | 4.9                | 0.6                |
| p.Thr790Met              | 4.6                | 0.1                |
| p.Ser752_Ile759del       | 2.0                | 0.2                |

### Supplementary Table 2. Rescue from FIIN-3 by various EGFR-mutant ORFs.

Log-fold change (LFC) for various EGFR-mutant ORFs following treatment with FIIN-3 at 100 nM or 300 nM.

**Supplementary Table 4**

| Cell line | Cancer type            | Oncogene alteration           | BGJ398 | FIIN-3 | IC50 (nM)  |         |          |          |          |        |        |         |
|-----------|------------------------|-------------------------------|--------|--------|------------|---------|----------|----------|----------|--------|--------|---------|
|           |                        |                               |        |        | Trametinib | LDC1267 | LOXO-101 | Imatinib | MGCD-265 | Torin2 | BKM120 | AZD8931 |
| NCI-H2077 | Lung adenoca           | FGFR1 amp                     | 17     | 3      | 3000       | 7430    | 2800     | 9250     | 6600     | 482    | 264    | 6184    |
| NCI-H520  | Lung SCC               | FGFR1 amp                     | 36     | 13     | 1326       |         |          |          |          |        |        |         |
| DMS114    | Small cell lung cancer | FGFR1 amp                     | 200    | 18     | 125        |         |          |          |          |        |        |         |
| AN 3CA    | Endometrial adenoca    | FGFR2 mutation                | 67     | 28     | 200        |         |          |          |          |        |        |         |
| RT112     | Bladder carcinoma      | FGFR3-TACC3 fusion, FGFR3 amp | 55     | 10     | 40         | 55000   | 2700     | 96000    | 10300    | 200    | 305    | 29790   |

**Supplementary Table 4. Cellular models employed in the colony formation assays.**

The cancer type and the oncogenic alteration are given for each cell line, as well as the IC<sub>50</sub> for each small-molecule inhibitor used. IC<sub>50</sub> is based on dose-response curves determined by Cell-Titer Glo at 96 hours (SCC, squamous cell cancer; adenoca, adenocarcinoma).
